# Supplementary material
Source: PubMed Central journal article supplement (PMC2544589)
Supplement: 0805968105_0805968105SI.pdf [file 0805968105_0805968105SI.pdf]

# Supporting Information

Chiu *et al.* 10.1073/pnas.0805968105

## SI Text

**Cardiovirus Screening of Stool from the SIFT Cohort.** From January 2000 to July 2004, patients (mostly children) with diarrhea, vomiting, or both were seen at 1 of 15 community clinics in northern California. Eligible households were scheduled for two home visits. During the first visit, the patient and consenting household members were interviewed regarding symptoms (nausea, vomiting, or unspecified GI symptoms), onset, and duration of gastroenteritis within the previous 10 days. During the second visit 3 to 5 months after the first visit, the patient and consenting household members were interviewed regarding resolution of GI and residual symptoms (if any). No information was obtained on fever or other constitutional symptoms. During each visit, biological specimens (serum, stool, or both) were obtained from the affected patient and consenting household members for diagnostic testing. Stools were preferentially collected over sera in children less than 2 years old, because *H. pylori* serodiagnostics were considered less accurate in this group. In older individuals, stools were obtained only if participants volunteered both stool and serum specimens or refused blood draw. Specimens were collected under protocols approved by the Stanford Institutional Review Board. Subjects participating in the last few years of the study were asked to consent to unspecified research using their de-identified biological specimens. In total, 4333 individuals in the SIFT study provided biological specimens; 3063 (71%) of these participants provided consent for use of de-identified specimens. Among the 3063 subjects who consented to further use of biological specimens, 774 stool specimens were obtained from 514 individuals; of those, 751 specimens from 498 subjects were available for study.

Those who provided consent for further use of specimens were younger (mean: 19.5 vs. 21.1 years, respectively,  $P = 0.004$ ) and more likely to be Hispanic (86% vs. 83%, respectively,  $P = 0.002$ ) than those who did not provide consent. Those who consented to unspecified use of specimens and those who did not were equally likely to provide stool specimens (17 vs. 18%, respectively,  $P = 0.3$ ).

Among the 3063 subjects who consented to further use of biological specimens, 774 stool specimens were obtained from 514 individuals; of those, 751 specimens from 498 subjects were available for study. Not unexpectedly based on the study design, those who provided stool samples were far younger (mean of 3.2 years) than those who did not (mean of 22.7 years,  $P < 0.001$ ); 80% of those who provided stool samples were children  $<2$  years of age. Compared with those who provided only serum, those who provided a stool sample were also more likely to be male (52% vs. 40%,  $P < 0.001$ ). Since young children were more likely to have GI symptoms than older subjects [Perry S, de la Luz Sanchez M, Hurst PK, Parsonnet J (2005) Household transmission of gastroenteritis. *Emerg Infect Dis* 11:1093–1096], diarrhea and vomiting were far more common among those who provided stool samples at first visit (11% vomiting, 19% diarrhea, and 56% both vomiting and diarrhea) than among those who did not (8% vomiting, 11% diarrhea, and 15% both vomiting and diarrhea; odds ratio for any symptoms = 11.7; 95% confidence interval: 8.8, 15.6). This difference was less marked when adjusted for age group ( $<2$  years, 2–17 years, 18+ years), although those individuals who provided stool were still more likely to have GI symptoms than those who did not (summary odds ratio = 2.4, 95% confidence interval: 1.5, 3.7).

## A L protein

|                 |                                                                                           |           |
|-----------------|-------------------------------------------------------------------------------------------|-----------|
| <b>HTCV-UC1</b> | <b>MA-----CKHGYP-LMCPLCTALDKTSDGLFTLLFDNEWYPTDLLTVDLDEEVFYPDD----PH-MEWTDLPLIQDIEMEPQ</b> | <b>71</b> |
| HTCV-Saf        | MA-----CKHGYP-FLCPLCTAIDISADGSFALLFDNEWYPTDLLTVDLDDDDVFHPPD----CV-MEWTDLPLIQDVLMEPQ       | 71        |
| Vilyuisk        | MA-----CKHGYP-DVCP ICTAIDVTPGF EYLLADGEWFP TDLLCVDLDDDDVF WPSDSSNQSQ TMEWTDIPLICDTVMEPQ   | 76        |
| TMEV-DA         | MA-----CKHGYP-DVCP ICTAVDVT PGFEYLLADGEWFP TDLLCVDLDDDDVF WPSNSNQSETMEWTDLPLVRDIMEPQ      | 76        |
| NGS910          | MA-----CIHGYP-SVCP ICTAIDKSSDGM YLLADNEWFPADLLTMDLDDDDVF WPNDESDVSETMDWTDLPFILDTIMEPQ     | 76        |
| EMCV            | MATTMEQEICAHSMTFEECPKCSALQYRNGF-YLLKYDEEWYPEESLT-DGEDDVFDP-----DLDM--EVPFETQ              | 67        |

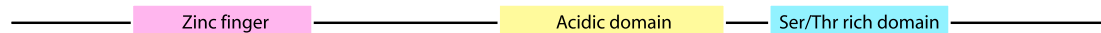

## L\* protein

|                 |                                                                                      |
|-----------------|--------------------------------------------------------------------------------------|
| <b>HTCV-UC1</b> | <b>TDIRLCALFALLSTKLRDFSPFCSTMNGTQLTYX</b>                                            |
| HTCV-Saf        | TDIRFCALFALLLSLQMDLLLYLTMNGTRLTSLLLTWTTTCFIPRIV-----WNGLIYHX                         |
| Vilyuisk        | MDTQTCALFAQPLTLLPALNICSWRTEGNSQRTFFVWTWTMTSSGLRTRAINLKQWNGLYRSYAILSWNPRETPRHLTRVTPS  |
| TMEV-DA         | MDTQMCALFAQPLTLLPDNICSWQTVNGSQRTFFVWTWTMTSSGLRTRAINLKQWNGLYRSYAILSWNPRETPLHLTRVTPS   |
| NGS910          | TDTQTCALFAQPLTLLPTLNICSWQTEGNSLRTEFFVWTWTMTSSGLRTRALNLKQWNGLYRSYAILSWNPREMPRHLIRVTPS |
| EMCV            | MDTQACVLFQAQPLTKVPTECICSWQITNGSQRI FLWWTMMTSSGLMTRAMCLRQWTGLTFRSYILSWNPRETPRHLTRVTPS |

## B CD loops

|                 | I                                                       | II |            |
|-----------------|---------------------------------------------------------|----|------------|
| <b>HTCV-UC1</b> | <b>LTPLPSNRLDDS-----TYGLAEQHRWLSFP---TDTKQTPPYKTKQD</b> |    | <b>111</b> |
| HTCV-Saf        | LTPLPSDRLKEN-----EFLGDEQHRWLSFQ---SATSSSTPPYRTKQD       |    | 111        |
| Vilyuisk        | LTPLPSYSPPDRPGQSPDTSKAPIQWRWISAVTESGTVSNTFPTRTRQD       |    | 118        |
| TMEV-DA         | LTPLPSYCPDSS-SGPVRTKAPVQWRWVRSG---GANGANFPLMTKQD        |    | 113        |
| NGS910          | LTPLPSYAPDST-TGPTETQAPIQWRWLRGT---SDGSTTFPLMTKQD        |    | 113        |
| EMC             | LTPGPQFDPAVD---QLRPQRLTEIWGNNGN---EETSKVFPLKSKQD        |    | 111        |

## EF loops

|                 | I                                                              | II |            |
|-----------------|----------------------------------------------------------------|----|------------|
| <b>HTCV-UC1</b> | <b>PEFDTSPYNATTEPTKAVPFQMDTQWQS--GKLLGHSYESTTLQGLRPLALNHQN</b> |    | <b>184</b> |
| HTCV-Saf        | PEFDTSSYSAVDDPIGEEPFKVDTTWQT--GSLRGHSYEDKSTQTLRPLALNHQN        |    | 184        |
| Vilyuisk        | PEFYTGTVATSGQEPNKVFLMDTTWQEPQAAPTGFYDQGN----GFFTLNHQN          |    | 182        |
| TMEV-DA         | PEFYTGKGTSGTMEPSDPTMDTTWRSPQSAPTGYRYDRQA----GFFAMNHQN          |    | 182        |
| NGS910          | PEFYTGHTPVTGTTEPQTPTFMDSSWQTPQQNPVGFYDGRGRT----GYFALNHQN       |    | 182        |
| EMC             | PEYPT-----LDAFAMNDRWSK-DNLPNGTRTQTNKK---GPFAMDHQN              |    | 171        |

**Fig. S1.** Alignment of cardiovirus proteins. (A) L protein and L\* proteins. The zinc-finger domain of the L protein is highlighted in pink, the acidic domain in yellow, and the Ser/Thr rich domain in cyan. Fully conserved residues of the L\* protein are highlighted in green, and stop codons are designated with an X. For Vilyuisk virus, TMEV-DA, Theiler-like NGS910 virus, and EMCV, only the first 84 aa of the L\* protein (~156 aa) are shown. (B) CD and EF loops. The regions corresponding to the CD loops of VP1 (I and II) and EF loops of VP2 (I and II) are highlighted in light tan. Sialic acid binding residues in the TMEV VP2 protein are shown boldfaced in red.



**Table S1. Primers used for cardiovirus screening and VP1 sequencing by RT-PCR**

| Primer       | Sequence                            | UC1 nucleotide position |
|--------------|-------------------------------------|-------------------------|
| CardioUTR-1F | 5'-CATTTCCGGCCAGGCTAAG-3'           | 121-141                 |
| CardioUTR-2R | 5'-GTGAACAAGCGCAAGGGAG-3'           | 222-203                 |
| CardioUTR-3R | 5'-GCTCACAGCAGTGGATCTTATCC-3'       | 729-707                 |
| CardioVP1-1F | 5'-ATGCAAGCCACCTATGCTATTTGGG-3'     | 2615-2639               |
| CardioVP1-2F | 5'-GGTGGGGATGACTTTACCCTCAGAATGCC-3' | 2825-2853               |
| CardioVP1-3R | 5'-TTGTAAGTGAATTGAATGATTCATCTG-3'   | 3771-3744               |
| CardioVP1-4R | 5'-TATTGACAAACTGTTCTGCCATG-3'       | 3798-3776               |
